# Supplementary material
Source: PubMed Central journal article supplement (PMC8804396)
Supplement: SMJ-62-525.pdf [file SMJ-62-525.pdf]

## SINGAPORE MEDICAL COUNCIL CATEGORY 3B CME PROGRAMME

(Code SMJ 202110B)

**Question 1.** Lipophilic beta-blockers include the following:

- (a) Metoprolol
- (b) Propranolol
- (c) Timolol
- (d) Atenolol

| True                     | False                    |
|--------------------------|--------------------------|
| <input type="checkbox"/> | <input type="checkbox"/> |

**Question 2.** The following drugs have predominantly renal clearance:

- (a) Propranolol
- (b) Metoprolol
- (c) Atenolol
- (d) Sotalol

|                          |                          |
|--------------------------|--------------------------|
| <input type="checkbox"/> | <input type="checkbox"/> |

**Question 3.** Indications for the use of beta-blockers include the following:

- (a) Acute coronary syndrome
- (b) Stable ischaemic heart disease
- (c) Heart failure
- (d) Supraventricular tachycardia

|                          |                          |
|--------------------------|--------------------------|
| <input type="checkbox"/> | <input type="checkbox"/> |

**Question 4.** Adverse events related to the use of beta-blockers include the following:

- (a) Masking of hypoglycaemic symptoms (e.g. tremor, tachycardia)
- (b) Impotence
- (c) Peripheral vasoconstriction
- (d) Coronary vasospasm and ischaemia

|                          |                          |
|--------------------------|--------------------------|
| <input type="checkbox"/> | <input type="checkbox"/> |

**Question 5.** Management of haemodynamically significant bradycardia includes the following:

- (a) Atropine
- (b) Dopamine
- (c) Transcutaneous pacing
- (d) Transvenous pacing

|                          |                          |
|--------------------------|--------------------------|
| <input type="checkbox"/> | <input type="checkbox"/> |

### Doctor's particulars:

Name in full: \_\_\_\_\_ MCR no.: \_\_\_\_\_  
 Specialty: \_\_\_\_\_ Email: \_\_\_\_\_

#### SUBMISSION INSTRUCTIONS:

Visit the SMJ website: <http://www.smj.org.sg/current-issue> and select the appropriate quiz. You will be redirected to the SMA login page.

**For SMA member:** (1) Log in with your username and password (if you do not know your password, please click on 'Forgot your password?'). (2) Select your answers for each quiz and click 'Submit'.

**For non-SMA member:** (1) Create an SMJ CME account, or log in with your SMJ CME username and password (for returning users). (2) Make payment of SGD 21.40 (inclusive of 7% GST) via PayPal to access this month's quizzes. (3) Select your answers for each quiz and click 'Submit'.

#### RESULTS:

(1) Answers will be published online in the SMJ December 2021 issue. (2) The MCR numbers of successful candidates will be posted online at the SMJ website by 31 December 2021. (3) Passing mark is 60%. No mark will be deducted for incorrect answers. (4) The SMJ editorial office will submit the list of successful candidates to the Singapore Medical Council. (5) One CME point is awarded for successful candidates. (6) SMC credits CME points according to the month of publication of the CME article (i.e. points awarded for a quiz published in the October 2021 issue will be credited for the month of October 2021, even if the deadline is in December 2021).

**Deadline for submission (October 2021 SMJ 3B CME programme): 12 noon, 24 December 2021.**
